# Supplementary material for: Lipoprotein Subclasses Independently Contribute to Subclinical Variance of Microvascular and Macrovascular Health
Source: Preprints.org preprint supplement (doi:10.20944/preprints202206.0299.v1), 2022-06-22
Supplement: Supplementary file 3 [file supplementary]

## Sheet: Tabelle1
analyte	unit	name	range min	-	range max		95% confidence interval range values for the model are derived from:						values of our cohort:	0.025	0.5	97.5%
TPTG	[mg/dL]	total triglycerides	53	-	490		Bruker IVDr Lipoprotein Subclass Analysis (B.I.LISA™) method							52.5115	112.58	460.285
TPCH	[mg/dL]	total cholesterol	140	-	341		as mentioned in the methods section							150.903	232.965	326.887
LDCH	[mg/dL]	LDL cholesterol	55	-	227									72.338	135.435	201.533
HDCH	[mg/dL]	HDL cholesterol	35	-	96									36.2652	61.08	96.358
TPA1	[mg/dL]	total Apo-A1	112	-	217									116.764	164.925	219.184
TPA2	[mg/dL]	total Apo-A2	24	-	48									29.4875	38.405	50.8473
TPAB	[mg/dL]	total Apo-B100	48	-	160									64.3203	104.625	154.664
LDHD	[-/-]	LDL-cholesterol/HDL-cholesterol ratio	0.98	-	4.08									1.01925	2.21	3.85475
ABA1	[-/-]	Apo-B100/Apo-A1 ratio	0.3	-	1.07									0.35975	0.64	1.06025
TBPN	[nmol/L]	total particle number	876	-	2908									1169.55	1902.28	2812.22
VLPN	[nmol/L]	VLDL particle number	50	-	473									46.462	152.975	489.973
IDPN	[nmol/L]	IDL particle number	36	-	316									35.6835	99.25	221.473
LDPN	[nmol/L]	LDL particle number	760	-	2560									926.039	1601.93	2271.79
L1PN	[nmol/L]	LDL-1 particle number	98	-	567									89.119	209.71	374.51
L2PN	[nmol/L]	LDL-2 particle number	47	-	427									20.9513	147.66	285.399
L3PN	[nmol/L]	LDL-3 particle number	51	-	499									21.763	187.69	333.637
L4PN	[nmol/L]	LDL-4 particle number	77	-	577									47.648	248.68	419.353
L5PN	[nmol/L]	LDL-5 particle number	86	-	615									157.611	344.555	584.461
L6PN	[nmol/L]	LDL-6 particle number	91	-	815									307.842	460.52	972.45
VLTG	[mg/dL]	VLDL triglycerides	21	-	336									34.1483	85.455	329.983
IDTG	[mg/dL]	IDL triglycerides	5	-	100									1.585	10.22	67.529
LDTG	[mg/dL]	LDL triglycerides	12	-	45									12.3432	20.435	40.7418
HDTG	[mg/dL]	HDL triglycerides	7	-	29									6.679	11.72	19.8013
VLCH	[mg/dL]	VLDL cholesterol	5	-	77									3.857	18.945	66.9243
IDCH	[mg/dL]	IDL cholesterol	4	-	50									3.14625	13.695	38.6608
VLFC	[mg/dL]	VLDL free cholesterol	3	-	33									3.045	9.665	31.583
IDFC	[mg/dL]	IDL free cholesterol	1	-	14									0.939	3.955	11.1373
LDFC	[mg/dL]	LDL free cholesterol	17	-	63									21.348	38.85	55.9995
HDFC	[mg/dL]	HDL free cholesterol	7	-	27									6.23675	14.1	23.4978
VLPL	[mg/dL]	VLDL phospholipids	6	-	68									6.93975	21.745	71.711
IDPL	[mg/dL]	IDL phospholipids	3	-	33									3.26925	8.165	26.3985
LDPL	[mg/dL]	LDL phospholipids	37	-	121									44.7242	73.495	104.878
HDPL	[mg/dL]	HDL phospholipids	57	-	136									51.9758	80.88	123.167
HDA1	[mg/dL]	HDL Apo-A1	110	-	222									115.354	163.955	223.046
HDA2	[mg/dL]	HDL Apo-A2	25	-	48									30.5515	39.085	51.3015
VLAB	[mg/dL]	VLDL Apo-B100	3	-	26									2.55575	8.41	26.9455
IDAB	[mg/dL]	IDL Apo-B100	2	-	17									1.964	5.455	12.1805
LDAB	[mg/dL]	LDL Apo-B100	42	-	141									50.9308	88.1	124.94
V1TG	[mg/dL]	VLDL-1 triglycerides	6	-	212									15.8205	45.31	177.126
V2TG	[mg/dL]	VLDL-2 triglycerides	3	-	67									1.4905	10.89	59.8778
V3TG	[mg/dL]	VLDL-3 triglycerides	2	-	49									1.238	9.6	46.9313
V4TG	[mg/dL]	VLDL-4 triglycerides	3	-	28									2.72925	9.31	23.666
V5TG	[mg/dL]	VLDL-5 triglycerides	1	-	7									1.46175	2.9	4.948
V1CH	[mg/dL]	VLDL-1 cholsesterol	1	-	35									1.29375	5.75	28.5558
V2CH	[mg/dL]	VLDL-2 cholsesterol	0	-	15									0.19975	2.28	12.5498
V3CH	[mg/dL]	VLDL-3 cholsesterol	0	-	16									0.36725	3.545	14.094
V4CH	[mg/dL]	VLDL-4 cholsesterol	1	-	15									1.52925	5.67	14.6183
V5CH	[mg/dL]	VLDL-5 cholsesterol	0	-	4									0.24	1.505	3.02825
V1FC	[mg/dL]	VLDL-1 free cholsesterol	0	-	13									0.02925	2.32	12.063
V2FC	[mg/dL]	VLDL-2 free cholsesterol	0	-	7									0	0.81	6.1875
V3FC	[mg/dL]	VLDL-3 free cholsesterol	0	-	8									0.07825	1.385	7.31775
V4FC	[mg/dL]	VLDL-4 free cholsesterol	0	-	7									0.35675	2.255	5.951
V5FC	[mg/dL]	VLDL-5 free cholsesterol	0	-	2									0	0.395	1.4925
V1PL	[mg/dL]	VLDL-1 phospholipids	1	-	32									2.012	6.775	28.3663
V2PL	[mg/dL]	VLDL-2 phospholipids	1	-	15									0.54975	2.925	13.4623
V3PL	[mg/dL]	VLDL-3 phospholipids	1	-	14									0.519	3.64	14.1578
V4PL	[mg/dL]	VLDL-4 phospholipids	2	-	13									1.62825	4.925	11.0553
V5PL	[mg/dL]	VLDL-5 phospholipids	0	-	5									0.38575	1.8	3.504
L1TG	[mg/dL]	LDL-1 triglycerides	3	-	14									1.265	4.515	13.2108
L2TG	[mg/dL]	LDL-2 triglycerides	1	-	6									0.4475	1.585	3.355
L3TG	[mg/dL]	LDL-3 triglycerides	1	-	6									1.2165	2.58	4.4055
L4TG	[mg/dL]	LDL-4 triglycerides	1	-	8									0.76925	2.7	5.52025
L5TG	[mg/dL]	LDL-5 triglycerides	1	-	9									1.329	3.31	6.9925
L6TG	[mg/dL]	LDL-2 triglycerides	1	-	13									2.3975	4.515	10.5788
L1CH	[mg/dL]	LDL-1 cholsesterol	8	-	59									7.57425	21.635	40.644
L2CH	[mg/dL]	LDL-2 cholsesterol	2	-	48									0	14.185	30.507
L3CH	[mg/dL]	LDL-3 cholsesterol	3	-	46									0	17.765	31.5218
L4CH	[mg/dL]	LDL-4 cholsesterol	4	-	49									0.7425	21.53	36.6917
L5CH	[mg/dL]	LDL-5 cholsesterol	5	-	49									11.668	27.22	47.201
L6CH	[mg/dL]	LDL-6 cholsesterol	6	-	54									21.0892	32.175	59.4505
L1FC	[mg/dL]	LDL-1 free cholsesterol	2	-	17									2.79825	6.93	12.1105
L2FC	[mg/dL]	LDL-2 free cholsesterol	1	-	14									0.389	4.665	10.452
L3FC	[mg/dL]	LDL-3 free cholsesterol	1	-	13									0.99625	5.62	10.015
L4FC	[mg/dL]	LDL-4 free cholsesterol	1	-	12									1.5585	6.47	10.19
L5FC	[mg/dL]	LDL-5 free cholsesterol	2	-	13									4.062	7.325	11.794
L6FC	[mg/dL]	LDL-6 free cholsesterol	2	-	12									5.388	8.83	14.8865
L1PL	[mg/dL]	LDL-1 phospholipids	6	-	30									5.19975	12.185	22.0225
L2PL	[mg/dL]	LDL-2 phospholipids	2	-	25									0.4175	7.95	16.453
L3PL	[mg/dL]	LDL-3 phospholipids	2	-	24									1.138	9.815	16.7365
L4PL	[mg/dL]	LDL-4 phospholipids	3	-	25									1.652	11.725	19.4693
L5PL	[mg/dL]	LDL-5 phospholipids	4	-	25									6.4565	14.335	23.8137
L6PL	[mg/dL]	LDL-6 phospholipids	4	-	28									11.6798	17.46	31.0938
L1AB	[mg/dL]	LDL-1 Apo-B100	5	-	31									4.89675	11.53	20.5995
L2AB	[mg/dL]	LDL-2 Apo-B100	3	-	23									1.1485	8.12	15.6958
L3AB	[mg/dL]	LDL-3 Apo-B100	3	-	27									1.19625	10.325	18.348
L4AB	[mg/dL]	LDL-4 Apo-B100	4	-	32									2.6195	13.675	23.061
L5AB	[mg/dL]	LDL-5 Apo-B100	5	-	34									8.6685	18.95	32.1405
L6AB	[mg/dL]	LDL-6 Apo-B100	5	-	45									16.9307	25.325	53.4778
H1TG	[mg/dL]	HDL-1 triglycerides	1	-	12									1.26725	3.185	6.80125
H2TG	[mg/dL]	HDL-2 triglycerides	1	-	5									0.889	1.725	2.93825
H3TG	[mg/dL]	HDL-3 triglycerides	1	-	5									1.095	2.165	4.28225
H4TG	[mg/dL]	HDL-4 triglycerides	2	-	8									1.6525	3.96	7.49225
H1CH	[mg/dL]	HDL-1 cholesterol	6	-	46									5.23725	14.85	41.9305
H2CH	[mg/dL]	HDL-2 cholesterol	4	-	16									3.7035	8.355	14.4943
H3CH	[mg/dL]	HDL-3 cholesterol	7	-	19									6.479	11.055	15.77
H4CH	[mg/dL]	HDL-4 cholesterol	11	-	30									17.9967	24.935	33.0108
H1FC	[mg/dL]	HDL-1 free cholesterol	1	-	12									1.37925	4.28	10.7945
H2FC	[mg/dL]	HDL-2 free cholesterol	1	-	5									0.88425	2.25	3.71225
H3FC	[mg/dL]	HDL-3 free cholesterol	1	-	5									1.4175	2.84	4.33075
H4FC	[mg/dL]	HDL-4 free cholesterol	2	-	9									3.313	5.33	7.6175
H1PL	[mg/dL]	HDL-1 phospholipids	8	-	57									6.4485	17.02	49.628
H2PL	[mg/dL]	HDL-2 phospholipids	7	-	27									6.0755	12.77	22.594
H3PL	[mg/dL]	HDL-3 phospholipids	12	-	32									10.478	17.505	25.9248
H4PL	[mg/dL]	HDL-4 phospholipids	20	-	44									23.839	32	44.55
H1A1	[mg/dL]	HDL-1 Apo-A1	6	-	75									6.196	20.865	68.304
H2A1	[mg/dL]	HDL-2 Apo-A1	10	-	36									11.7153	19.71	30.5193
H3A1	[mg/dL]	HDL-3 Apo-A1	18	-	47									17.9418	28.86	41.2855
H4A1	[mg/dL]	HDL-4 Apo-A1	56	-	110									68.236	90.82	118.762
H1A2	[mg/dL]	HDL-1 Apo-A2	1	-	8									0.74925	2.425	6.3545
H2A2	[mg/dL]	HDL-2 Apo-A2	2	-	8									1.848	3.66	5.88
H3A2	[mg/dL]	HDL-3 Apo-A2	5	-	12									4.578	7.135	10.8545
H4A2	[mg/dL]	HDL-4 Apo-A2	12	-	30									17.0338	24.84	33.5775
